# Supplementary material
Source: PubMed Central journal article supplement (PMC7536992)

Participants Per County

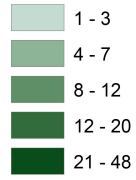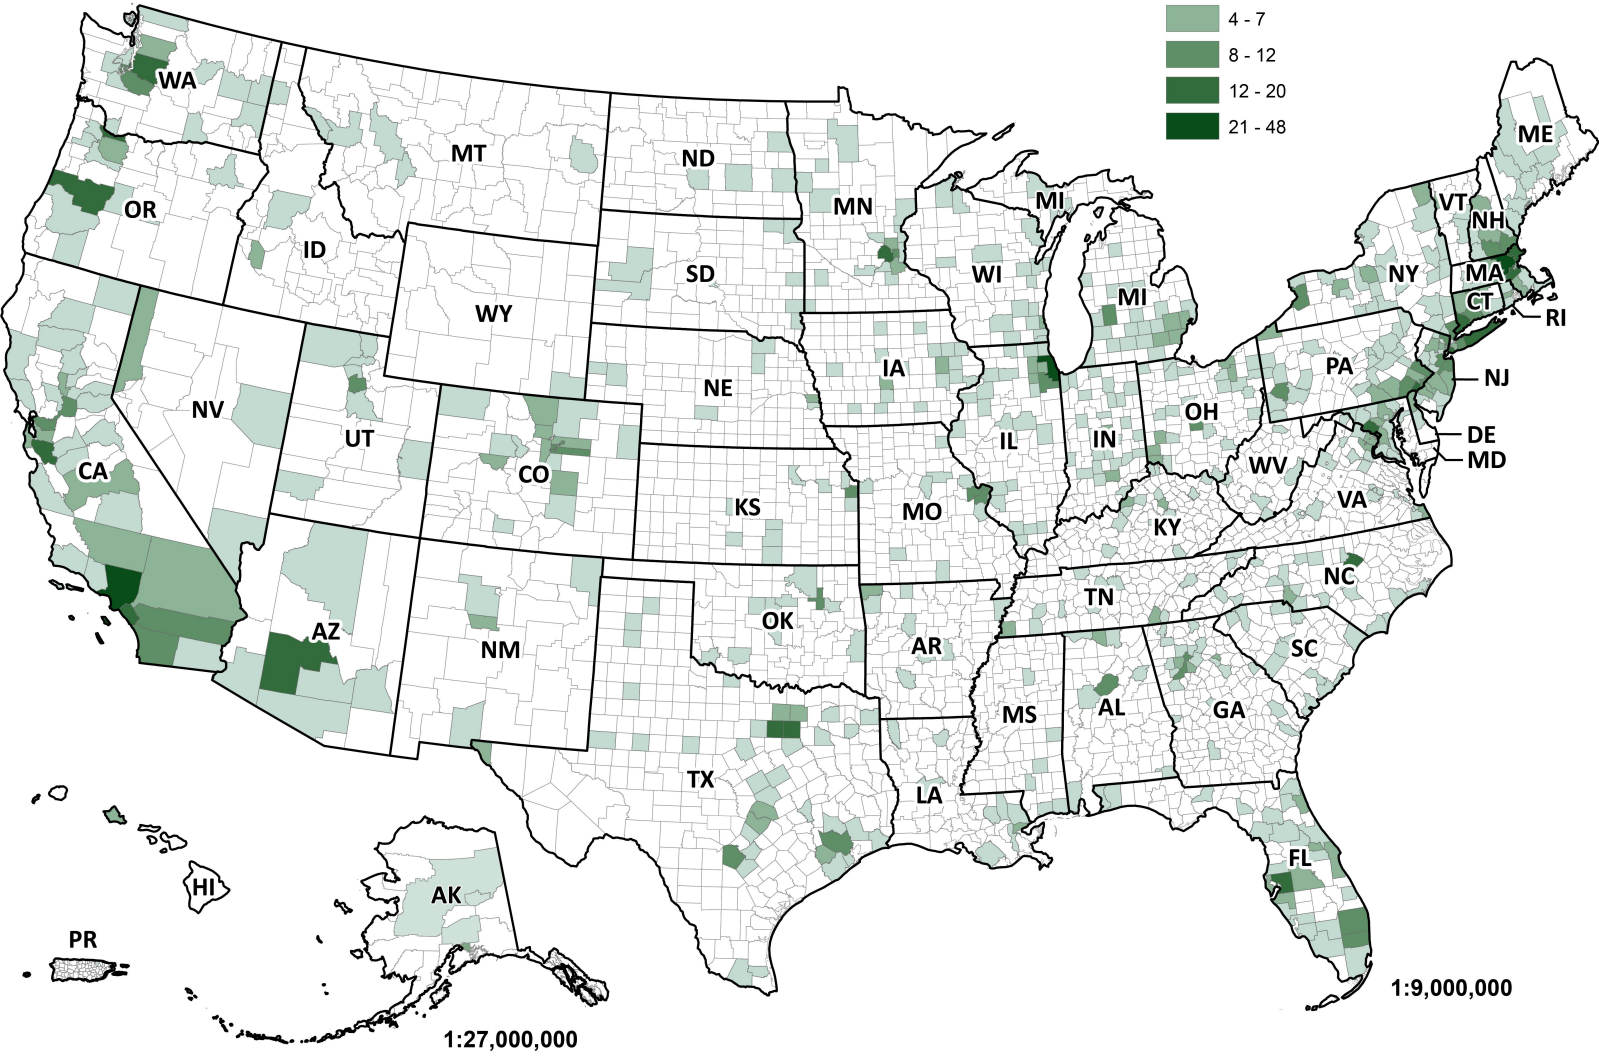

Supplement: AJHB-33-0-s001.pdf [file AJHB-33-0-s001.pdf]
